# Supplementary material
Source: PubMed Central journal article supplement (PMC3220449)
Supplement: supp_M111.286039_jbc.M111.286039-2.pdf [file supp_M111.286039_jbc.M111.286039-2.pdf]

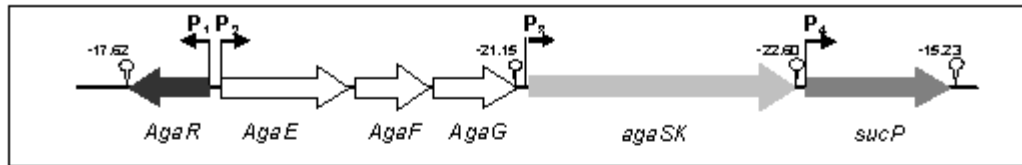

|                |                                        |                                       |                                       |                                              |                                            |                       |
|----------------|----------------------------------------|---------------------------------------|---------------------------------------|----------------------------------------------|--------------------------------------------|-----------------------|
| Length (bp)    | 843                                    | 1302                                  | 864                                   | 843                                          | 2808                                       | 1479                  |
| MM (kDa)       | 32.3                                   | 49.1                                  | 32.2                                  | 31.2                                         | 105.5                                      | 56.2                  |
| F <sub>1</sub> | Transcriptional regulator, AraC family | ABC transporter, transmembrane domain | ABC transporter, transmembrane domain | ABC transporter, substrate binding component | $\alpha$ -galactosidase/<br>sucrose kinase | Sucrose phosphorylase |
