# Supplementary material
Source: PubMed Central journal article supplement (PMC3220449)

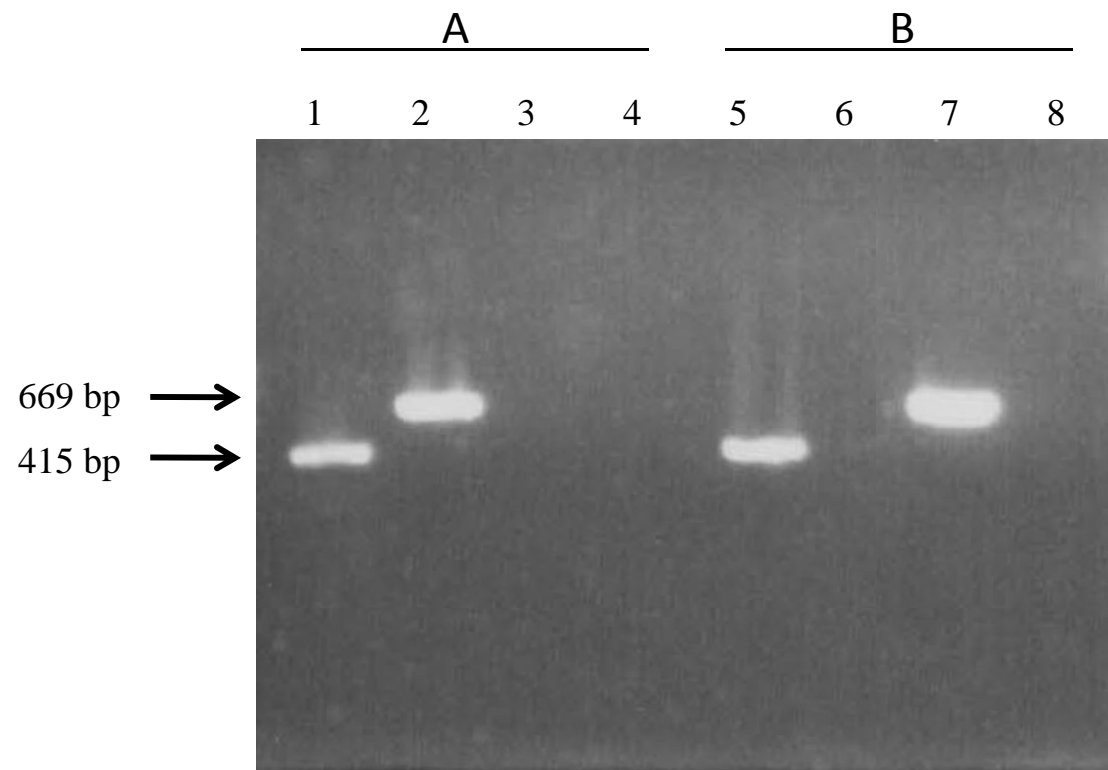

Supplement: supp_M111.286039_jbc.M111.286039-3.pdf [file supp_M111.286039_jbc.M111.286039-3.pdf]

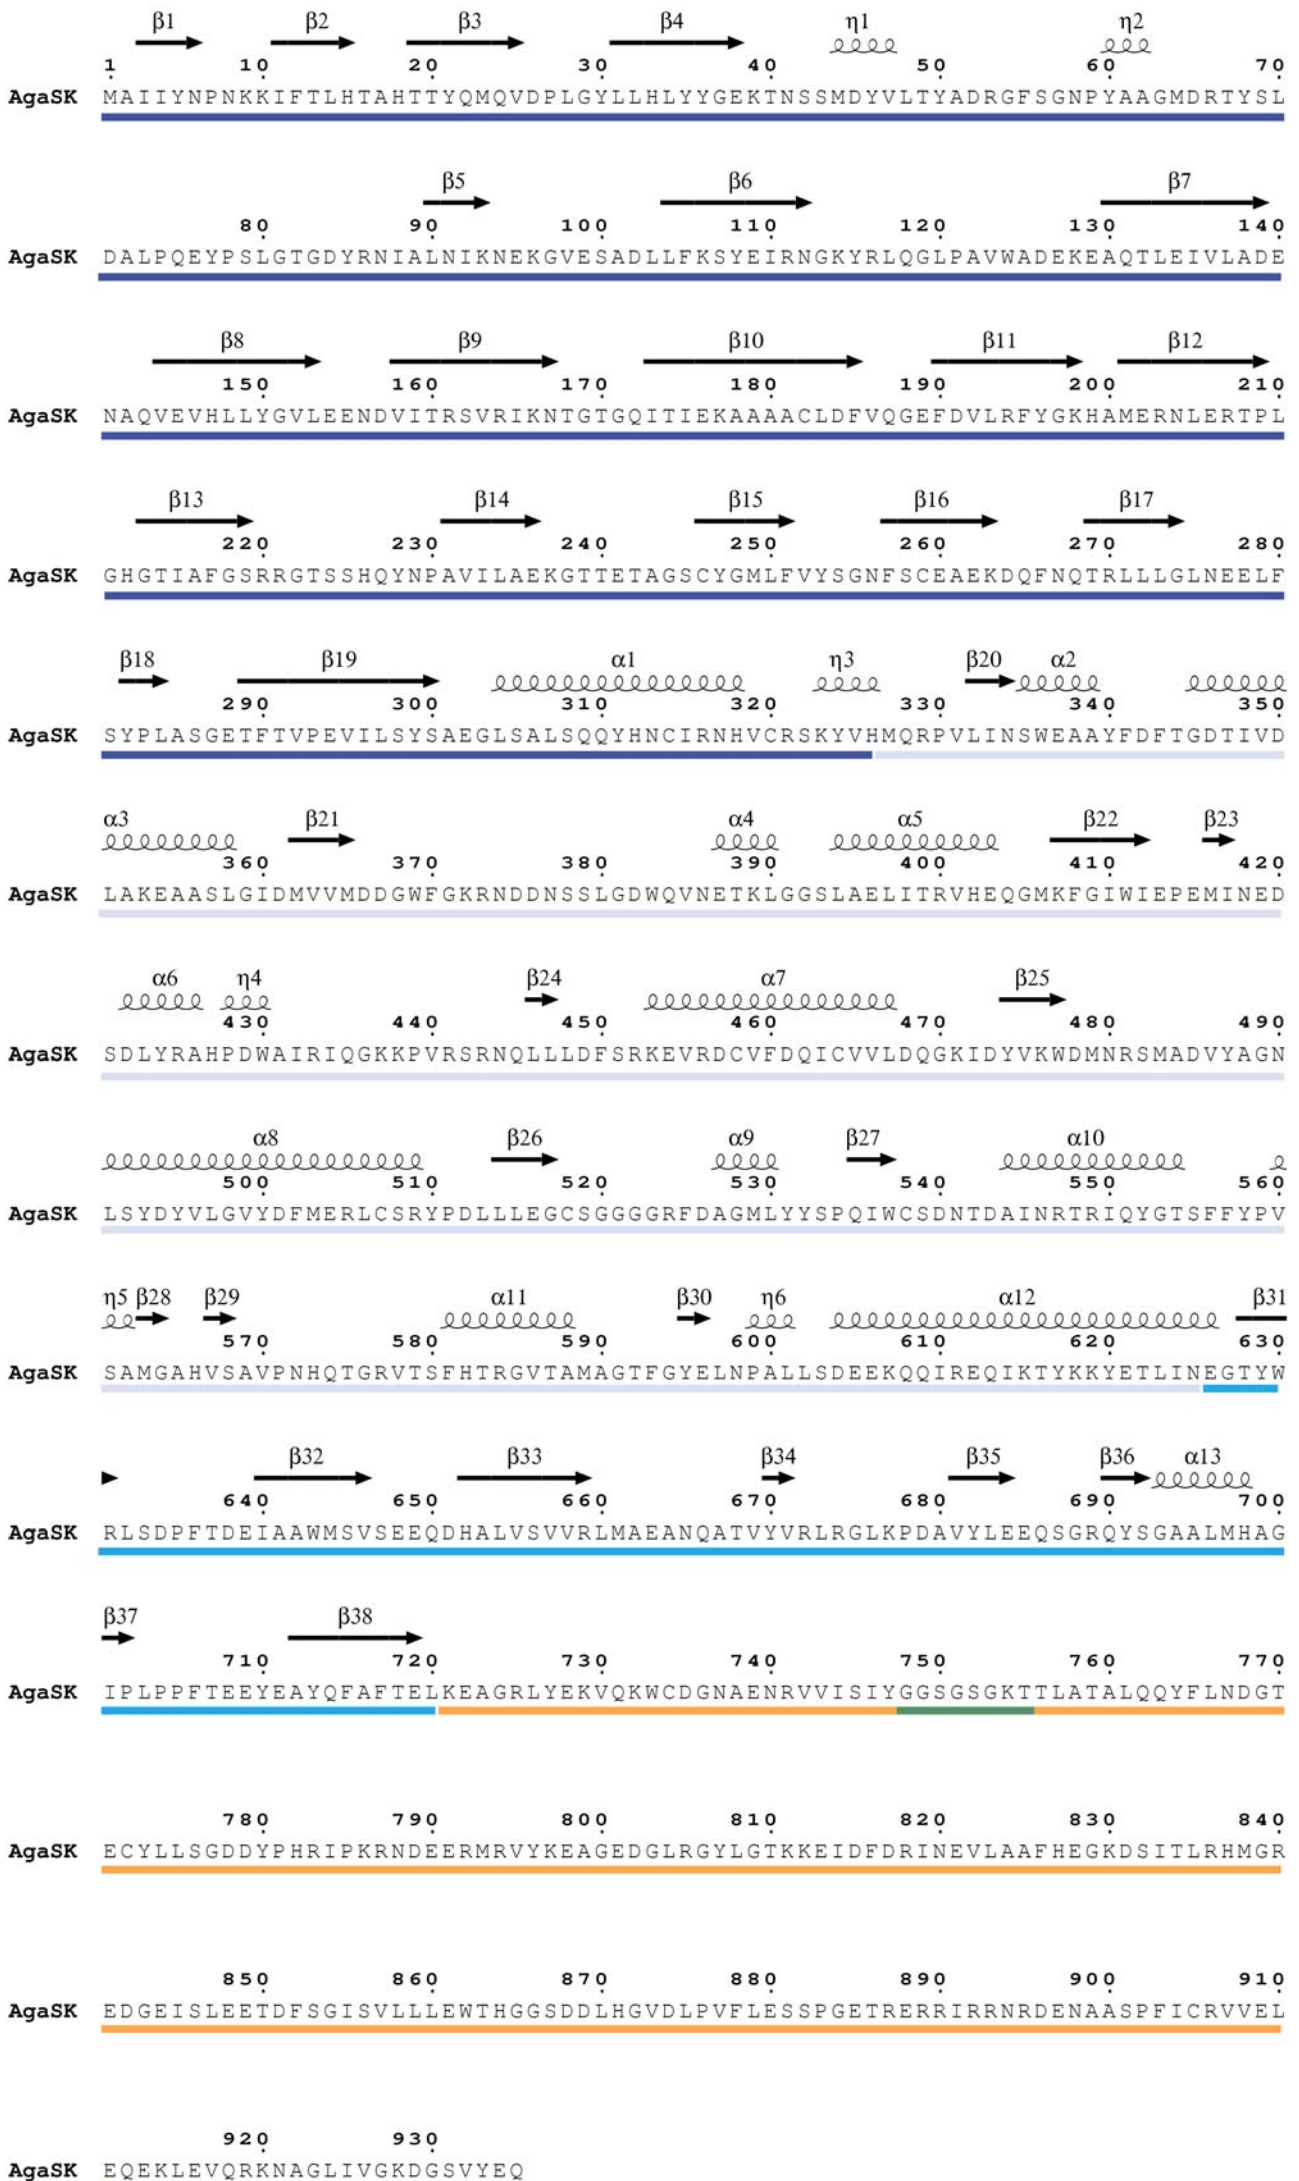

Supplement: supp_M111.286039_jbc.M111.286039-4.pdf [file supp_M111.286039_jbc.M111.286039-4.pdf]

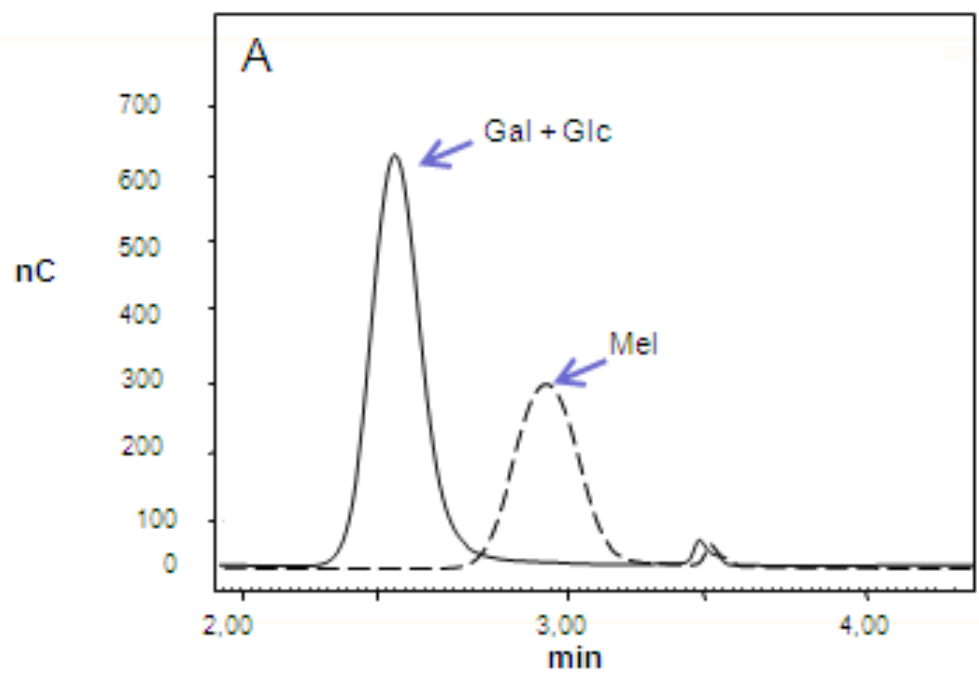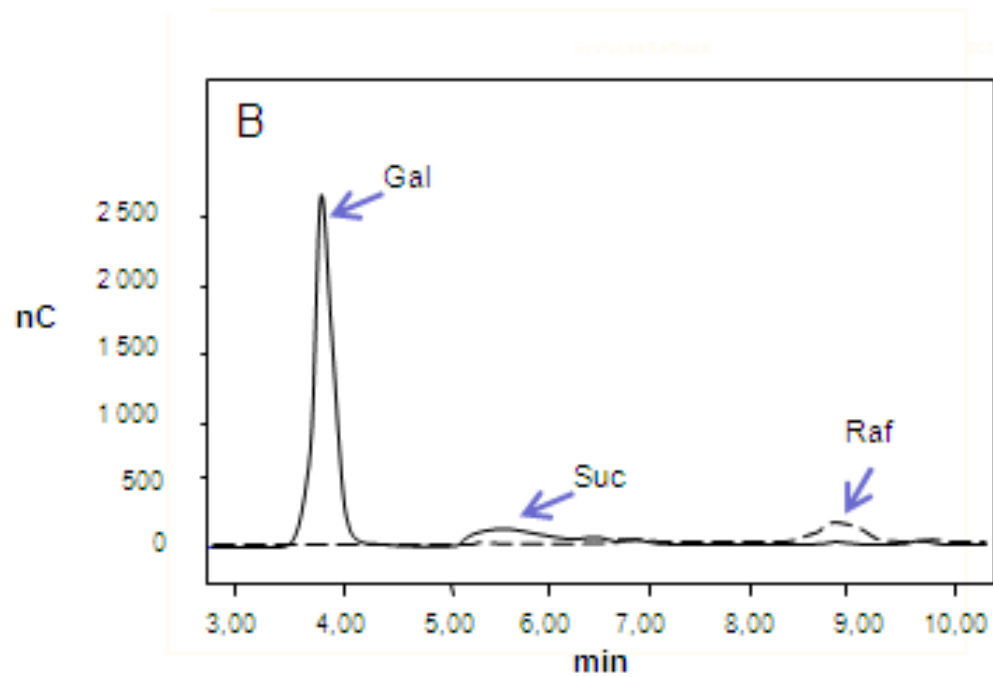

Supplement: supp_M111.286039_jbc.M111.286039-5.pdf [file supp_M111.286039_jbc.M111.286039-5.pdf]

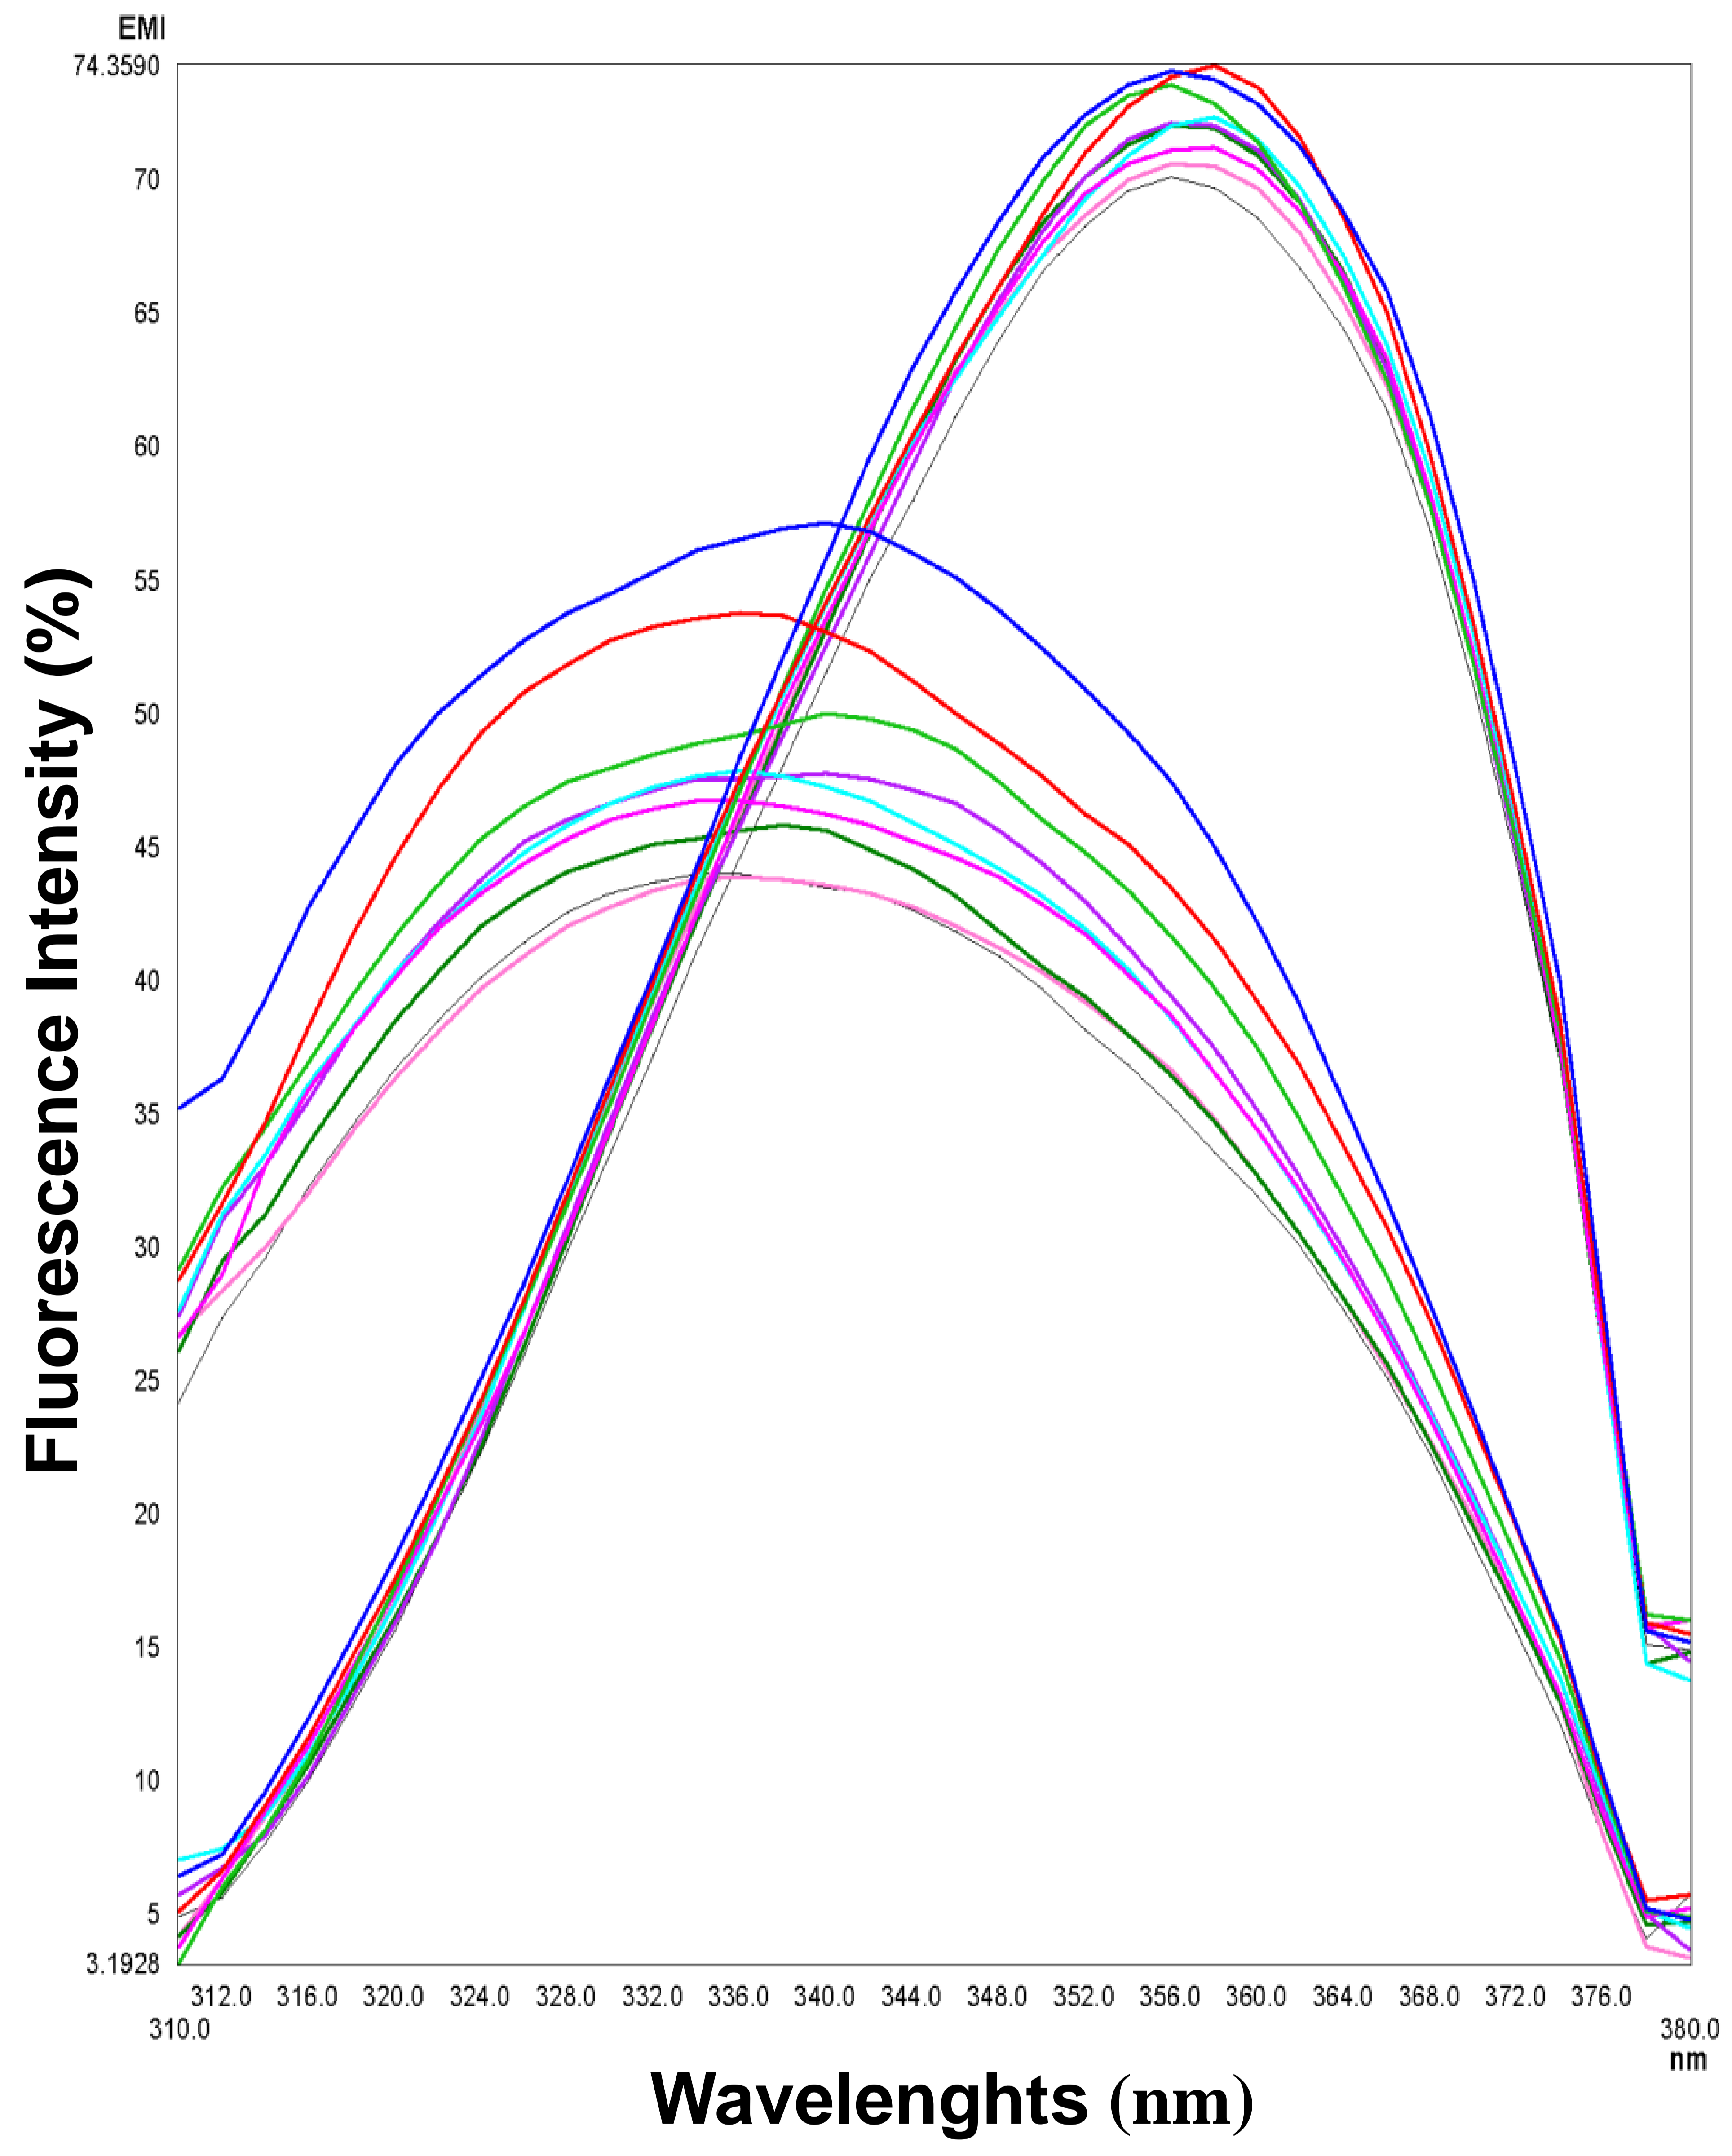

Supplement: supp_M111.286039_jbc.M111.286039-6.pdf [file supp_M111.286039_jbc.M111.286039-6.pdf]

**A**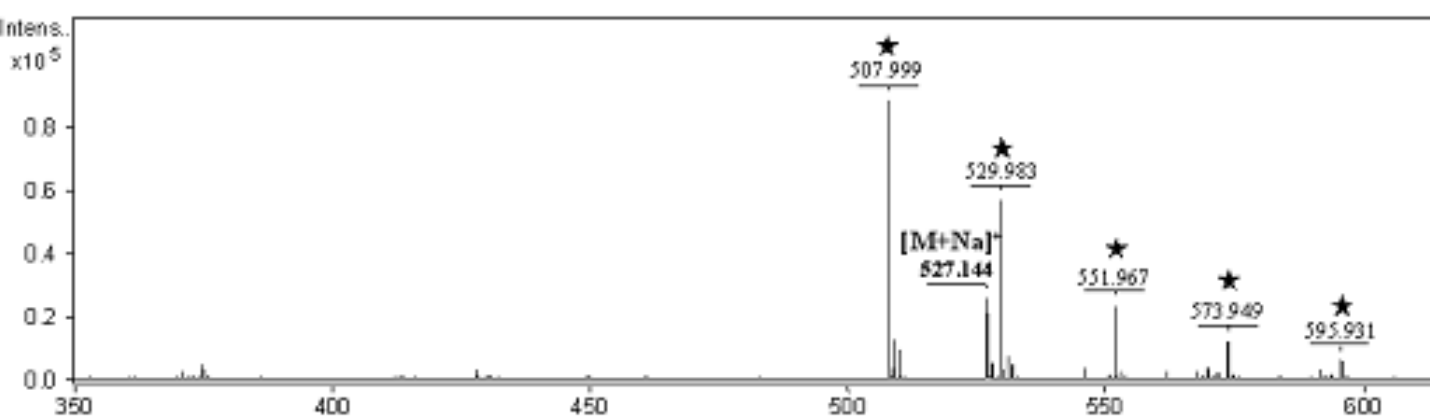**B**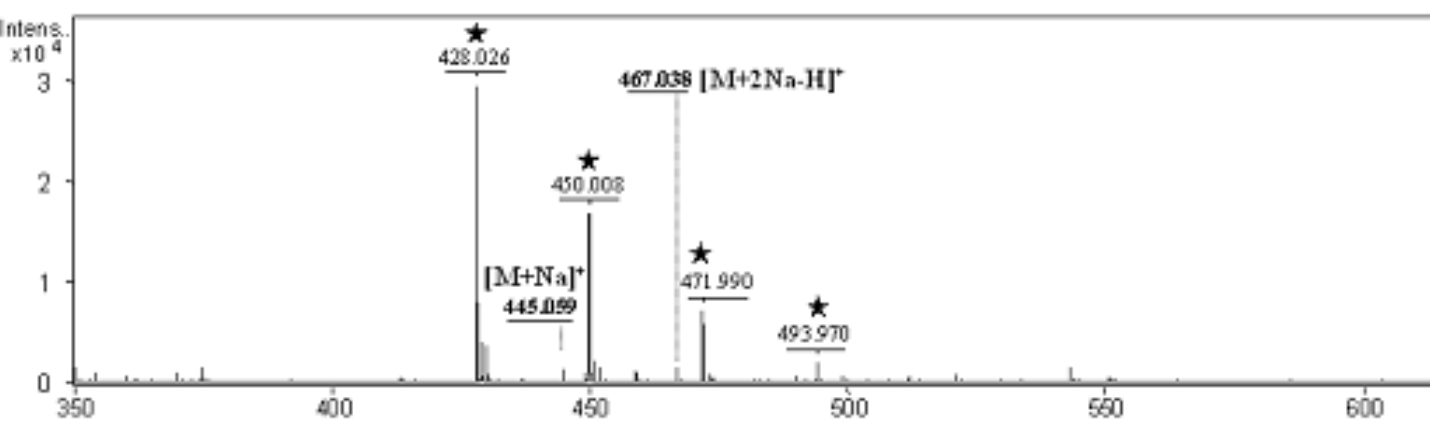

Supplement: supp_M111.286039_jbc.M111.286039-7.pdf [file supp_M111.286039_jbc.M111.286039-7.pdf]
